# Supplementary material
Source: HighWire-hosted journal article supplement (https://jnm.snmjournals.org/highwire/filestream/95102/field_highwire_adjunct_files/0/189993_Supplemental_Data.pdf)
Supplement: 189993_Supplemental_Data.pdf [file 189993_Supplemental_Data.pdf]

**Supplemental Table 1** Biodistribution results of <sup>111</sup>In-labeled POZ derivatives in nude mice 1 day

after intratumoral injection of probe. Results are expressed as means (%ID) ± SD (n=3).

| Organ     | EtPOZ       | IspPOZ      | Isp-PrPOZ   | PrPOZ       |
|-----------|-------------|-------------|-------------|-------------|
| Heart     | 0.18 ± 0.05 | 0.09 ± 0.07 | 0.02 ± 0.01 | 0.01 ± 0.00 |
| Lungs     | 0.23 ± 0.04 | 0.15 ± 0.06 | 0.08 ± 0.11 | 0.05 ± 0.03 |
| Liver     | 1.14 ± 0.10 | 1.40 ± 0.43 | 3.28 ± 3.88 | 2.36 ± 0.75 |
| Kidneys   | 0.72 ± 0.06 | 1.36 ± 0.32 | 5.38 ± 0.74 | 1.07 ± 0.15 |
| Stomach   | 0.25 ± 0.03 | 0.11 ± 0.05 | 0.27 ± 0.04 | 0.08 ± 0.02 |
| Intestine | 0.84 ± 0.08 | 1.52 ± 0.66 | 1.87 ± 0.62 | 0.50 ± 0.07 |
| Pancreas  | 0.20 ± 0.05 | 0.09 ± 0.04 | 0.16 ± 0.07 | 0.06 ± 0.02 |
| Spleen    | 0.17 ± 0.07 | 0.13 ± 0.08 | 0.30 ± 0.38 | 0.07 ± 0.02 |

**Supplemental Table 2** Biodistribution results of  $^{111}\text{In-EtPOZ}$  in nude mice after intravenous injection of probe. Results are expressed as means (%ID/g)  $\pm$  SD (n=3).

|           | 1 h              | 6 h             | 24 h            |
|-----------|------------------|-----------------|-----------------|
| Blood     | 10.36 $\pm$ 0.26 | 5.54 $\pm$ 0.29 | 2.25 $\pm$ 0.31 |
| Heart     | 2.49 $\pm$ 0.67  | 1.18 $\pm$ 0.17 | 0.71 $\pm$ 0.06 |
| Lungs     | 3.26 $\pm$ 0.75  | 1.75 $\pm$ 0.24 | 1.18 $\pm$ 0.30 |
| Liver     | 1.93 $\pm$ 0.29  | 1.34 $\pm$ 0.14 | 1.50 $\pm$ 0.33 |
| Kidneys   | 3.36 $\pm$ 0.43  | 2.55 $\pm$ 0.27 | 1.97 $\pm$ 0.44 |
| Stomach   | 1.49 $\pm$ 0.65  | 0.70 $\pm$ 0.44 | 0.35 $\pm$ 0.12 |
| Intestine | 1.10 $\pm$ 0.11  | 0.54 $\pm$ 0.17 | 0.43 $\pm$ 0.07 |
| Pancreas  | 1.78 $\pm$ 0.32  | 1.02 $\pm$ 0.14 | 0.69 $\pm$ 0.15 |
| Spleen    | 1.43 $\pm$ 0.31  | 1.04 $\pm$ 0.14 | 1.03 $\pm$ 0.25 |
| Muscle    | 0.50 $\pm$ 0.19  | 0.33 $\pm$ 0.04 | 0.33 $\pm$ 0.07 |

**Supplemental Table 3** Biodistribution results of  $^{111}\text{In}$ -IspPOZ in nude mice after intravenous injection of probe. Results are expressed as means (%ID/g)  $\pm$  SD (n=3).

|           | 1 h              | 6 h              | 24 h             |
|-----------|------------------|------------------|------------------|
| Blood     | 6.50 $\pm$ 3.74  | 0.39 $\pm$ 0.30  | 0.10 $\pm$ 0.10  |
| Heart     | 3.02 $\pm$ 0.91  | 2.72 $\pm$ 0.45  | 2.81 $\pm$ 0.50  |
| Lungs     | 2.98 $\pm$ 0.82  | 1.47 $\pm$ 0.27  | 1.57 $\pm$ 0.22  |
| Liver     | 10.78 $\pm$ 5.74 | 14.57 $\pm$ 4.95 | 11.31 $\pm$ 4.28 |
| Kidneys   | 29.91 $\pm$ 1.85 | 18.62 $\pm$ 1.20 | 15.97 $\pm$ 2.46 |
| Stomach   | 2.79 $\pm$ 0.55  | 5.52 $\pm$ 1.46  | 4.82 $\pm$ 1.34  |
| Intestine | 2.02 $\pm$ 0.14  | 2.79 $\pm$ 1.35  | 3.52 $\pm$ 0.32  |
| Pancreas  | 3.10 $\pm$ 0.27  | 4.07 $\pm$ 0.33  | 4.31 $\pm$ 0.12  |
| Spleen    | 3.52 $\pm$ 0.66  | 4.80 $\pm$ 0.91  | 4.47 $\pm$ 0.86  |
| Muscle    | 0.61 $\pm$ 0.14  | 0.62 $\pm$ 0.20  | 0.56 $\pm$ 0.16  |

**Supplemental Table 4** Biodistribution results of  $^{111}\text{In}$ -Isp-PrPOZ in nude mice after intravenous injection of probe. Results are expressed as means (%ID/g)  $\pm$  SD (n=3).

|           | 1 h              | 6 h              | 24 h             |
|-----------|------------------|------------------|------------------|
| Blood     | 0.25 $\pm$ 0.05  | 0.06 $\pm$ 0.01  | 0.03 $\pm$ 0.02  |
| Heart     | 0.40 $\pm$ 0.05  | 0.35 $\pm$ 0.01  | 0.39 $\pm$ 0.06  |
| Lungs     | 20.50 $\pm$ 3.45 | 20.03 $\pm$ 3.15 | 14.05 $\pm$ 2.84 |
| Liver     | 28.20 $\pm$ 1.81 | 25.72 $\pm$ 2.34 | 32.02 $\pm$ 3.26 |
| Kidneys   | 17.49 $\pm$ 1.60 | 17.41 $\pm$ 1.74 | 12.75 $\pm$ 1.34 |
| Stomach   | 1.42 $\pm$ 0.55  | 0.74 $\pm$ 0.30  | 0.96 $\pm$ 0.18  |
| Intestine | 0.85 $\pm$ 0.06  | 0.67 $\pm$ 0.21  | 0.67 $\pm$ 0.34  |
| Pancreas  | 0.91 $\pm$ 0.11  | 1.07 $\pm$ 0.04  | 1.00 $\pm$ 0.10  |
| Spleen    | 19.87 $\pm$ 3.70 | 16.45 $\pm$ 1.88 | 20.75 $\pm$ 0.67 |
| Muscle    | 0.21 $\pm$ 0.08  | 0.21 $\pm$ 0.07  | 0.20 $\pm$ 0.16  |

**Supplemental Table 5** Biodistribution results for  $^{111}\text{In-PrPOZ}$  in nude mice after intravenous injection of probe. Results are expressed as means (%ID/g)  $\pm$  SD (n=3).

|           | 1 h              | 6 h               | 24 h              |
|-----------|------------------|-------------------|-------------------|
| Blood     | 0.22 $\pm$ 0.04  | 0.17 $\pm$ 0.05   | 0.05 $\pm$ 0.02   |
| Heart     | 0.41 $\pm$ 0.06  | 0.31 $\pm$ 0.19   | 0.42 $\pm$ 0.06   |
| Lungs     | 3.57 $\pm$ 0.46  | 3.59 $\pm$ 1.10   | 3.04 $\pm$ 0.49   |
| Liver     | 56.29 $\pm$ 4.78 | 58.27 $\pm$ 6.39  | 52.24 $\pm$ 8.60  |
| Kidneys   | 7.02 $\pm$ 0.60  | 7.33 $\pm$ 1.27   | 5.10 $\pm$ 0.49   |
| Stomach   | 0.68 $\pm$ 0.08  | 0.64 $\pm$ 0.20   | 0.34 $\pm$ 0.07   |
| Intestine | 0.56 $\pm$ 0.04  | 0.54 $\pm$ 0.02   | 0.52 $\pm$ 0.02   |
| Pancreas  | 1.09 $\pm$ 0.10  | 1.32 $\pm$ 0.14   | 0.99 $\pm$ 0.04   |
| Spleen    | 22.91 $\pm$ 4.45 | 23.50 $\pm$ 12.35 | 25.88 $\pm$ 12.64 |
| Muscle    | 0.16 $\pm$ 0.09  | 0.35 $\pm$ 0.24   | 0.15 $\pm$ 0.06   |

**Supplemental Video 1:** Real-time observation of self-aggregation of POZ derivatives when heated at around body temperature (36.5°C).

Images were obtained after drop the solution of EtPOZ and Isp-PrPOZ (2000  $\mu$ M) on a plate heated at 36.5°C. Rapid aggregation of Isp-PrPOZ with Tt under body temperature was shown.
